1 **Title:**

2 Comparative Genomics Shows Differences in the Electron Transport and Carbon Metabolic  
3 Pathways of *Mycobacterium africanum* relative to *Mycobacterium tuberculosis* and suggests  
4 an adaptation to low oxygen tension

5

6 **Authors and Affiliations:**

7 Boatema Ofori-Anyinam<sup>1,2,3</sup>, Abi Janet Riley<sup>2</sup>, Tijan Jobarteh<sup>2</sup>, Ensa Gitteh<sup>2</sup>, Binta Sarr<sup>2</sup>, Tutty  
8 Isatou Faal-Jawara<sup>2</sup>, Leen Rigouts<sup>1,4</sup>, Madikay Senghore<sup>2</sup>, Aderemi Kehinde<sup>5,6</sup>, Nneka  
9 Onyejebu<sup>7</sup>, Martin Antonio<sup>2,8,9</sup>, Bouke C. de Jong<sup>1</sup>, Florian Gehre<sup>1,2,10</sup>, Conor J. Meehan<sup>1,11\*</sup>

10 <sup>1</sup>Mycobacteriology Unit, Institute of Tropical Medicine, Antwerp, Belgium

11 <sup>2</sup>Vaccines and Immunity Theme, Medical Research Council Unit, The Gambia, Banjul, The  
12 Gambia

13 <sup>3</sup>Center for Global Health Security and Diplomacy, Ottawa, Canada

14 <sup>4</sup>Department of Biomedical Sciences, Antwerp University, Antwerp, Belgium

15 <sup>5</sup>Department of Medical Microbiology & Parasitology, University College Hospital, Ibadan,  
16 Nigeria

17 <sup>6</sup>Department of Medical Microbiology & Parasitology, College of Medicine, University of  
18 Ibadan, Ibadan, Nigeria

19 <sup>7</sup>Center for Tuberculosis Research, Nigeria Institute of Medical Research, Lagos, Nigeria

20 <sup>8</sup>Division of Infectious and Tropical Diseases, London School of Hygiene & Tropical Medicine,  
21 London, United Kingdom

22 <sup>9</sup>Medical School, University of Warwick, Coventry, United Kingdom

23 <sup>10</sup> Bernhard-Nocht Institute for Tropical Medicine, Hamburg, Germany

24 <sup>11</sup>School of Chemistry and Biosciences, University of Bradford, Bradford, United Kingdom

25

26 **\*Corresponding Author:** Conor J. Meehan, University of Bradford, Richmond Building,  
27 Richmond Road, BD7 1DP, UK, c.meehan2@bradford.ac.uk

28

29 **Summary:**

30 The geographically restricted *Mycobacterium africanum* lineages (MAF) are primarily found  
31 in West Africa, where they account for a significant proportion of tuberculosis. Despite this  
32 phenomenon, little is known about the co-evolution of these ancient lineages with West  
33 Africans. MAF and *M. tuberculosis* sensu stricto lineages (MTB) differ in their clinical, in vitro  
34 and in vivo characteristics for reasons not fully understood. Therefore, we compared  
35 genomes of 289 MAF and 205 MTB clinical isolates from the 6 main human-adapted *M.*  
36 *tuberculosis* complex lineages, for mutations in their Electron Transport Chain and Central  
37 Carbon Metabolic pathway in order to explain these metabolic differences. Furthermore, we  
38 determined, in silico, whether each mutation could affect the function of genes encoding  
39 enzymes in these pathways.

40 We found more mutations with the potential to affect enzymes in these pathways in MAF  
41 lineages compared to MTB lineages. We also found that similar mutations occurred in these  
42 pathways between MAF and some MTB lineages.

43 Generally, our findings show further differences between MAF and MTB lineages that may  
44 have contributed to the MAF clinical and growth phenotype and indicate potential adaptation  
45 of MAF lineages to a distinct ecological niche, which we suggest includes areas characterized  
46 by low oxygen tension.

47

48 **Running title:** The *M. africanum* respiratory chain and carbon metabolic pathway

49

50 **Keywords:** Tuberculosis, *Mycobacterium africanum*, *Mycobacterium tuberculosis*, genome,  
51 Electron Transport, Carbon Metabolism

52

## 53 1 Introduction

54 The *Mycobacterium tuberculosis* complex (MTBC) consists of a group of human-adapted  
55 ecotypes- *Mycobacterium tuberculosis* sensu stricto, *Mycobacterium africanum*,  
56 *Mycobacterium canetti* and animal-adapted ecotypes (1-4). There are seven known MTBC  
57 lineages (L) associated with particular geographic regions and adapted to specific human  
58 populations. These are the five lineages that make up *M. tuberculosis* sensu stricto (lineages  
59 1-4 and lineage 7) and the two *M. africanum* lineages (lineages 5 and 6). Africa uniquely has  
60 a representation of all seven lineages.

61 MTBC strains from the seven lineages differ on average by about 1200 single nucleotide  
62 polymorphisms (5), with clear distinction between MAF and MTB lineages (6-8).

63 MTB Lineages 2 and 4 are more widespread geographically, more pathogenic and more  
64 transmissible, while MAF Lineages are exclusively found in West Africa and less transmissible  
65 (5, 9, 10). Clinically, MTB L4 is relatively more virulent than MAF L6 as evidenced by  
66 significantly faster progression, in contacts of infectious cases, to active disease (11). MAF  
67 lineages are associated with extrapulmonary disease and MAF L6 more commonly causes  
68 disease in immunocompromised persons and those with lower Body Mass Index, implying a  
69 more opportunistic pathogen (10, 12). Furthermore, MAF L5 and L6 grow markedly slower  
70 than MTB and prefer microaerobic growth conditions (13-15). Reasons for these differences  
71 are not completely known, although ours and other's previous studies have attempted to  
72 explain some of the observations. A study documented non-synonymous SNPs or frameshift  
73 mutations in some genes associated with growth attenuation in MAF and higher mutation  
74 frequency in genes necessary for transport of sulphur, ions and lipids/fatty acids across the  
75 cell membrane (14). Another reported under-expression of, and MAF L6 specific mutations  
76 in, dormancy regulon genes, a network of genes crucial for the survival of MTB during hypoxia  
77 or anaerobiosis (15, 16).

78 Genes that encode proteins involved in nutrient metabolism and respiration, which are  
79 closely linked and together govern bacterial growth and survival, and those of unknown  
80 function, the conserved hypotheticals, are highest among the 4173 MTB H37Rv genes  
81 reported, emphasizing the importance of the nutrient metabolic and respiratory pathways  
82 (17).

83 As obligate aerobes, the mycobacteria respire and produce energy from varied nutritional or  
84 energy sources, such as carbon sources (18, 19). These enable the bacteria even to maintain  
85 metabolism without growth. The nutritional demands of the mycobacteria have been a topic  
86 of interest for over 100 years. Pioneering work throughout the 20th century elegantly showed  
87 that mycobacteria had unique nutritional requirements (20-29). Central to these findings was  
88 that different members of the MTBC were supported by different nutritional sources and  
89 consistent results of multiple phenotypic studies led to differentiating members of the MTBC  
90 based on their nutritional requirements (20, 30). For instance, it was observed that MTB  
91 showed eugonic growth on glycerol, while colonies of MAF and *M. bovis* were dysgonic,  
92 indicating an inability to properly utilize this carbon source. MAF and *M. bovis* were only able  
93 to show luxurious growth in the presence of sodium pyruvate (20, 30). Furthermore, MAF was  
94 found to grow small umbilicated colonies, which on paraffin embedded thin sections revealed  
95 extension deep into the media, rather than the surface (31).

96 Almost all the energy used by the bacteria is derived from the Central Carbon Metabolic  
97 Pathway. After nutrients are metabolized through this pathway, reducing equivalents are  
98 generated that eventually enter into the Electron Transport Chain for the generation of  
99 significant amounts of Adenosine Triphosphate (ATP) (18, 32).

100 Mycobacteria generate ATP via substrate level phosphorylation and oxidative  
101 phosphorylation, which produces more ATP through the activity of the F<sub>1</sub>-F<sub>0</sub> ATP synthase in  
102 the Electron Transport Chain. Substrate level phosphorylation alone is insufficient to support  
103 growth of these bacteria (18).

104 Genome sequencing analyses show that the mycobacteria possess a branched respiratory  
105 pathway for electron transfer from electron donors to acceptors under different growth  
106 conditions. However, it appears that the transfer of electrons to oxygen, which seems to be  
107 the most preferred terminal electron acceptor, occurs with little plasticity, given that only two  
108 terminal oxidases have been found in mycobacteria, the bioenergetically more efficient *aa3*-  
109 type cytochrome c and the less efficient cytochrome *bd*-type menaquinol oxidases (33).  
110 During hypoxia or anoxia, mycobacterial growth is inhibited, even in the presence of alternate  
111 terminal electron acceptors within the branched respiratory chain such as fumarate and

112 nitrate reductase. However, mycobacteria are still able to adapt and maintain metabolic  
113 functions (33).

114 Therefore, an intact Central Carbon Metabolic pathway and Electron Transport Chain are  
115 essential to mycobacterial growth and survival.

116 The importance of comparative genomics in unravelling the basis of distinct metabolic  
117 phenotypes in the MTBC has been shown. Using molecular genomic approaches, previous  
118 authors found that the inability of *M. bovis* to use glycerol and carbohydrates as sole carbon  
119 sources and its requirement for pyruvate in growth media was caused by a single nucleotide  
120 polymorphism in the *pykA* gene, encoding pyruvate kinase, resulting in a Glu220Asp amino  
121 acid substitution and causing the disruption of sugar catabolism (34). This mutation was also  
122 found in 3 MAF strains tested in the same analysis. Additionally, the authors showed that a  
123 frameshift at codon 191 of the *glpK* gene of the same *M. bovis* strain led to an incomplete  
124 coding sequence and the inability to use glycerol, although this *glpK* mutation was not present  
125 in all *M. bovis* strains.

126 Therefore, we aimed to investigate the genes involved in central carbon metabolism and  
127 respiration in the MTB and MAF lineages using a whole genome sequencing approach coupled  
128 with comparative genomics. We find important differences between the MAF and MTB  
129 lineages in their energy and nutrient metabolic pathways that likely contributed to the  
130 phenotypic differences observed between these lineages.

131

## 132 **2 Materials and Methods**

### 133 **2.1 Ethical Statement**

134 The study was conducted within the framework of an intervention trial of Enhanced Case  
135 Finding (ECF) in the Greater Banjul Area of The Gambia (Clinicaltrials.gov NCT01660646),  
136 piloted in 2012 and conducted between 2013 and 2017. This study was carried out in  
137 accordance with the recommendations of the Joint Gambia Government/MRC Ethics  
138 Committee and the Institute of Tropical Medicine, Antwerp Institutional Review Board. The  
139 protocol, including bacterial sub-studies, was approved by the Joint Gambia  
140 Government/MRC Ethics Committee and the Institute of Tropical Medicine, Antwerp

141 Institutional Review Board. Nigerian isolates were collected from Southwest Nigeria within  
142 the West African Node of Excellence for TB, AIDS and Malaria (WANETAM) with the  
143 recommendations of the University of Ibadan and University College Hospital, Ibadan Joint  
144 Ethical Review Committees and the Nigerian Institute of Medical Research, Institutional Board  
145 (35). All subjects gave written informed consent in accordance with the Declaration of Helsinki  
146 and were anonymized.

147

## 148 **2.2 Bacterial isolates**

149 In The Gambia, MTB L4 followed by MAF L6 are the most isolated MTBC lineages. For almost  
150 a decade, the prevalence of all the MTBC lineages isolated in The Gambia has remained  
151 constant at 4.3% (L1), 2.5% (L2), 0.8% (L3), 57.2% (L4), 1.0% (L5), and 35.4% (L6) (36).

152 Within the framework of the ECF study conducted in the Greater Banjul Area, we sequenced  
153 280 MAF L6 (32%), 3 MAF L5 (0.3%), 19 MTB L1 (2.2%), 36 MTB L2 (4%)(Beijing), 10 MTB L3  
154 (1%) and 534 (60.5%) MTB L4 consisting of 85 MTB L4 Cameroon (9.6%), 15 MTB L4 Ghana  
155 (1.7%), 224 MTB L4 Haarlem (25.3%), and 211 MTB L4 LAM (23.9%). Given that only 3 MAF  
156 L5 were isolated from The Gambia within the period of analysis, we included 6 MAF L5 from  
157 Nigeria (Eastern West Africa), to improve the representativeness of this lineage.

158 Of this dataset, we analyzed the whole genome sequences of all 280 MAF L6 strains, the 3  
159 MAF L5 isolated from The Gambia and the 6 MAF L5 from Nigeria, resulting in a total 289  
160 MAF strains. For the MTB lineages, we analyzed a total 205 strains consisting of all 19 MTB  
161 L1, all 10 MTB L3 and 15 MTB L4 Ghana, 35 MTB L2 and a random number of L4 Haarlem  
162 (44), Cameroon (36) and LAM (46), while ensuring that all MTB L4 sublineages isolated were  
163 represented and isolates from each year of isolation, 2012 to 2014, were included.

## 164 **2.3 DNA Extraction**

165 Genomic DNA was extracted from loopfuls of pure MTBC colonies grown on Lowenstein-  
166 Jensen media (37) using the Maxwell 16 DNA Purification Kit (Promega). DNA from Nigerian  
167 strains was extracted using the Cetyl trimethylammonium bromide (CTAB) method (38).

## 168 **2.4 Whole-genome sequencing**

169 Sequencing of MTBC isolates was performed at MicrobesNG, Birmingham; GenoScreen,  
170 France; FISABIO, Valencia or the Beijing Genome Institute (BGI), Beijing. Sequencing reads  
171 were generated on a HiSeq or Miseq platform (Illumina). Quality control was performed for  
172 each provider to ensure adequate sequencing depth (>30X) and genome coverage (>95% of  
173 the H37Rv reference strain). Raw Illumina reads have been deposited in the ENA with  
174 accession <to be undertaken on acceptance>.

175

## 176 **2.5 Bioinformatics Analysis**

### 177 **2.5.1 Mapping and Variant calling**

178 We used Snippy version 3.1 for the analysis of genomes. Briefly, paired-end raw reads of each  
179 sample were mapped to the *M. tuberculosis* H37Rv reference genome (GenBank accession  
180 number: NC\_000962.3) using BWA-MEM 0.7.12 (39). Mapped reads were converted to the  
181 SAM/BAM format and sorted using Samtools 1.3.1 (40). Variant calling was done using  
182 Freebayes 0.9.20 (41). Variants were called only if  $\geq 10$  reads covered variant positions and  
183  $\geq 90\%$  of those reads differed from the reference. Genes were annotated with SnpEff 4.1 (42).  
184 Samples were assigned to MTBC lineages based on the classification of Coll and colleagues  
185 (43) using the VCF output of snippy and the PhyResSE SNP list (44).

### 186 **2.5.2 Phylogenetic analysis**

187 Using the Snippy output folders of all isolates and custom python scripts, a SNP alignment and  
188 a count of all excluded invariant sites were created. A maximum-likelihood (ML) phylogeny  
189 was inferred using RAxML version 8.2.9 (45) executing a thousand rapid bootstrap inferences  
190 under the general time-reversible (GTR) model, with ascertainment bias correction using the  
191 Stamatakis reconstituted DNA approach (46, 47). The resulting tree was exported to  
192 interactive Tree of Life (iTOL) for visualization (48).

### 193 **2.5.3 Protein Predictions**

194 The effect of amino acid substitutions were predicted using PROVEAN software tools at  
195 default settings (PROVEAN protein) (49-51). The PROVEAN NCBI non redundant 2012

196 database is a newer and larger sequence database than SIFT databases (52) but comparable  
197 to SIFT in prediction accuracy. A PROVEAN score of  $\leq -2.5$  implies that the amino acid  
198 substitution could impact negatively on protein function.

199

### 200 **3 Results and Discussion**

201 Given that generalists and specialists differ in the vastness of their ecological niches (53), and  
202 thus carbon sources, we compared the specialist MAF lineages (289 strains) to the generalist  
203 MTB lineages (205 strains) for genomic differences in their Electron Transport and Carbon  
204 metabolic pathways. These pathways are intrinsically linked and are central to deriving energy  
205 (ATP) from carbon sources (Figure 1).

206 Understanding differences in metabolism and respiration between the MTBC lineages is also  
207 pertinent for tackling TB as mycobacterial central metabolism and respiration have re-  
208 emerged as potential targets for TB chemotherapy. The new TB drug, Bedaquiline (TMC207)  
209 and the drug candidate, Telacebec (Q203), both target the respiratory chain (54-56) and even  
210 the repurposed drug Clofazimine, and another new drug, Delamanid, reportedly interfere  
211 with redox cycling and cellular respiration by generating Reactive Intermediates (57-61). Thus  
212 respiratory inhibitors may offer the next generation of core drugs against mycobacterial  
213 diseases (62) and there is a pressing need to understand the differences in these processes  
214 between the different lineages of the MTBC.

215 It is now increasingly apparent that genetic and metabolic differences between the MTBC  
216 human-adapted lineages have the potential to affect transmission, diagnostics and treatment  
217 (5, 63-68). Moreover, niche adaptation is influenced by the metabolic requirements of an  
218 organism, a consequence of evolution. However, the extent of such genetic changes and their  
219 potential metabolic effects has not been well explored. In this study, we found a large number  
220 of mutations with the potential to negatively affect gene function (hereafter referred to as  
221 harmful mutations), particularly in MAF lineages (Figure 2 and Figure 4). However, we also  
222 observed that similarities in these pathways occurred between some MTB and MAF lineages  
223 potentially due to convergent evolution.

224



### 225 **3.1 Mutations in genes encoding Central Carbon Metabolic pathway enzymes.**

226 We examined mutations in all genes in the glycolytic pathway, the Tricarboxylic Acid cycle and  
227 the Methylcitrate Cycle. Genes and enzymes in these pathways contribute directly to the  
228 growth and virulence of the MTBC, by generating products that feed directly into the Electron  
229 Transport Chain (69). Therefore, mutations, with the potential to affect proper function of  
230 these genes and their gene products, would have obvious consequences downstream, for  
231 energy generation, survival and ultimately, the virulence of members of the MTBC.

#### 232 **3.1.1 The Glycolytic Pathway**

233 In MAF lineages, all genes leading to the breakdown of sugars to 2-phosphoglycerate at the  
234 seventh step (Figure 2 and Figure 3), were generally conserved. However, at the critical stage  
235 of pyruvate metabolism, mutations with the potential to affect the normal function of Enolase  
236 (*eno*), Pyruvate kinase (*pykA*) and Pyruvate carboxylase (*pca*) were detected. Enolase is  
237 responsible for the penultimate step of glycolysis, where 2-phosphoglycerate is converted to  
238 Phosphoenolpyruvate. Pyruvate kinase modulates the irreversible reaction converting  
239 Phosphoenolpyruvate to Pyruvate while Pyruvate carboxylase drives the conversion of  
240 Pyruvate to Oxaloacetate. Of these three genes, it had previously been shown, in *M. bovis*  
241 and 3 MAF strains, that the mutation in *pykA* rendered the critical enzyme pyruvate kinase  
242 inactive, resulting in a metabolic block at the level of pyruvate biosynthesis (34). We also  
243 confirm this mutation in the MAF strains we analyzed in our study (Figure 2). However, to the  
244 best of our knowledge this is the first report on lineage-specific mutations with potentially  
245 harmful effects in the essential gene *eno*, in MAF L6. *eno* is found on the surface of many  
246 pathogenic bacteria and beyond its primary role in glycolysis, aids in tissue remodeling and  
247 invasion of host cells (70). This gene was recently reported as a novel target for the 2-  
248 aminothiazoles of the aminothiazole (AT) series, that exerted its effect by inhibiting *eno* in  
249 MTB H37Rv (L4 strain). Therefore, the potentially harmful mutations we detected in *eno* may  
250 affect energy metabolism and potentially contributes to the metabolic block at the level of  
251 pyruvate biosynthesis, further reducing the fitness of L6.

252 Unlike the MAF lineages, MTB lineages, notably, did not have any potentially harmful  
253 mutations in *eno* and *pykA* (Figure 2 and Figure 3), implying a general ability to complete  
254 glycolysis. However, mutations were detected in Glucose-6-phosphate isomerase (*pgi*) in L4

255 LAM and in Phosphofructokinase B (*pfkB*) in MTB L3, at the second and third steps of glycolysis  
256 respectively, where Glucose-6-phosphate is converted to Fructose-6-phosphate and  
257 subsequently to Fructose-1-6-biphosphate (Figure 3). *pgi* is essential for the in vitro growth  
258 of *M. tuberculosis*, and *M. smegmatis pgi* mutants are glucose auxotrophs. Moreover, an  
259 additional role for *pgi* in cell wall biosynthesis was reported (37, 71-73). Therefore, *pgi* is  
260 important and the effect of the predicted harmful mutations we detected in *pgi* in L4 LAM  
261 should be investigated. However, the defect in *pfkB* in MTB L3 is unlikely to affect glycolysis  
262 given that Phosphofructokinase activity has so far only been associated with *pfkA*, where a  
263 *pfkA* deletion mutant was neither able to grow on glucose in vitro nor to have any detectable  
264 Phosphofructokinase activity; the mutant could not be rescued by expressing *pfkB* (32, 74).

265 Interestingly, additional genes, Pyruvate carboxylase (*pca*) in MAF L5 and MTB L3 and  
266 Phosphoenolpyruvate carboxylase (*pckA*) in MTB L4 Cameroon, were mutated at the level of  
267 pyruvate metabolism (Figure 3). *pca* and *pckA* secrete enzymes that contribute significantly  
268 to the control of metabolic flux to glycolysis, gluconeogenesis and anaplerosis. These genes  
269 carry out functions related to cholesterol detoxification and lipogenesis during intracellular  
270 survival and *pckA* was shown to be essential for virulence in *M. bovis* (75, 76).

### 271 **3.1.2 The Tricarboxylic Acid Cycle**

272 At the final stage of glycolysis, pyruvate is generated and converted to Acetyl Coenzyme A  
273 (Figure 1 and Figure 3), that is fed into the critical Tricarboxylic Acid Cycle (TCA), for the release  
274 of reducing equivalents into the Electron Transport Chain. Therefore, the ability to complete  
275 this cycle, whether by progression through all stages of the cycle or via the crucial glyoxylate  
276 by-pass, is essential for the generation of ATP.

277 Overall, genes encoding enzymes of the TCA cycle were largely conserved in MAF and MTB  
278 lineages, however, in MTB L1-L3, L4 Haarlem, L4 Ghana and MAF lineages, we found  
279 potentially harmful mutations in Isocitrate lyase (*icl2a*) and Isocitrate dehydrogenase (*icd2*).

280 Emphasizing the importance of the glyoxylate shunt, *M. tuberculosis* strains lacking both ICLs  
281 are unable to grow on fatty acids in vitro, establish and maintain a chronic infection in mice  
282 and were said to be the most severely attenuated strains (32, 77). In our analysis, we found  
283 the frameshift mutation previously found in H37Rv, an L4 strain (78), which we, for the first  
284 time to the best of our knowledge, also report in MTB L4 Haarlem and Ghana, MTB L1, L2, L3,

285 MAF L5 and L6, yet, interestingly, not in MTB L4 Cameroon and LAM (Figure 2, Figure 3 and  
286 Table 1).

287 As stated earlier, in section 3.1.1, Pyruvate carboxylase (*pca*), that converts pyruvate to  
288 oxaloacetate towards the final stage of glycolysis, was mutated in L5, however, at the last  
289 step of the TCA cycle, malate dehydrogenase (*mdh*) that converts malate to oxaloacetate, was  
290 also mutated (Figure 2, Figure 3 and Table 1), implying that both routes for the production of  
291 oxaloacetate in MAF L5 have mutated genes. Given that oxaloacetate feeds not only into the  
292 TCA cycle but also into the methylcitrate cycle, impaired function of *mdh* may affect energy  
293 metabolism in MAF L5.

294 Overall, with major blocks in Central Carbon Metabolism in MAF lineages, the number of  
295 reducing equivalents produced via the central carbon metabolic pathway for electron  
296 transport may be lower. MTB lineages largely had a conserved glycolytic pathway and TCA  
297 cycle, however, different MTB lineages have previously been shown to have different growth  
298 rates and patterns (79-81). Notably, the growth rate of MTB L3 is reportedly lower compared  
299 to other MTB lineages (79, 80). Therefore, in MTB lineages/sublineages where we found more  
300 potentially harmful mutations, particularly in MTB L3, further investigations on the effect of  
301 these mutations on energy metabolism need to be carried out as slower growth of these  
302 lineages may be directly linked to impaired energy metabolism.

303

### 304 **3.2 Mutations in genes encoding Electron Transport Chain enzymes**

305 As reducing equivalents, like NADH, from the Central Carbon Metabolic Pathway deliver  
306 electrons into the Electron Transport Chain, NADH dehydrogenases serve as the gateway of  
307 the Electron Transport Chain in the MTBC and electrons are transferred from NADH oxidation  
308 to quinone reduction and ultimately to ATP synthase for ATP production in greater quantities  
309 (Figure 1). Therefore, defects in the Electron Transport Chain are bound to affect the net yield  
310 of ATP generated.

311 Relative to MTB lineages, MAF lineages had multiple mutations predicted to affect the normal  
312 function of genes encoding key enzymes of the Electron Transport Chain (Figure 4 and Figure  
313 5).

314 Potentially harmful mutations were detected in *ndhA*, *pruB*, *qcrC*, *ctaB*, *frdA*, *atpHG*, *sdhA* and  
315 *ald* (Figure 4, Figure 5, Table 2 and Supplementary File S3). Interestingly, for some MTB  
316 lineages, mutations predicted to affect gene function were also found in *ndhA*, *Rv0249c*, *frdB*,  
317 *atpD*, and *nuoDHF* (Figure 4, Figure 5, Table 2 and Supplementary File S4).

### 318 **3.2.1 NADH dehydrogenases**

319 To receive NADH from central metabolism into the Electron Transport Chain, *M. tuberculosis*  
320 possesses two NADH dehydrogenases, NDH-1 and -2. NDH-1 has 14 subunits (*nuoA-N*) while  
321 two copies of NDH-2 exist in *M. tuberculosis*: *ndh* and *ndhA*. Between the two NADH  
322 dehydrogenases, an essential role of *ndh* for the growth of *M. tuberculosis* was reported  
323 previously and a function of *ndh* in recycling NADH and maintaining an energized membrane  
324 was documented (33, 82). Even though *ndhA* was previously reported to be dispensable for  
325 growth, it was recently shown that both *ndh* and *ndhA* differentially control oxygen  
326 consumption (82). In fact, *ndh* was also shown to be dispensable for growth of *M. tuberculosis*  
327 but deletion of both *ndh* and *ndhA* prevented growth altogether in standard media and  
328 resulted in attenuated growth in mice (82, 83). We found a potentially harmful mutation in  
329 *ndhA* in all MAF L5. Given the adaptation of MAF lineages towards a microaerophilic lifestyle,  
330 *ndhA* may be redundant in MAF L5 and defects in this gene may have coincided with the  
331 adaptation to a microaerophilic lifestyle (84).

332 No potentially harmful mutations were detected in the essential *ndh* in any analyzed genome.  
333 This implies that the function of *ndh* is likely conserved across the MTBC lineages.

### 334 **3.2.2 Succinate dehydrogenases**

335 Succinate dehydrogenase 1 (*Rv0247c-Rv0249c*, SDH-1) functions during aerobic respiration  
336 when oxygen and nutrients are abundant, while SDH-2 (*sdhABCD*) functions during  
337 hypoxia/anaerobiosis, when nutrients are limited (33, 85, 86) (Figure 5). Succinate  
338 dehydrogenases are a direct link between the TCA cycle and electron transport and typically  
339 reduce succinate to fumarate (87).

340 The only potentially harmful mutations we detected in the Succinate dehydrogenases were  
341 in *sdhA* of SDH2 in a clade of MAF L6 and in SDH1, *Rv0249c*, in a clade of MTB L1 (Figure 4).  
342 Given the essential role of SDH1 for growth and survival, where the deletion of SDH1 was

343 shown to impair the rate of respiration through the Electron Transport Chain and to reduce  
344 cell viability (85), future studies should determine if electron transport and aerobic respiration  
345 are affected in certain MTB L1 strains, as recent studies report slower growth and a lower  
346 odds to grow in culture for MTB L1 and the MAF lineages (67, 79).

### 347 **3.2.3 Cytochrome bc1-aa3 complexes and Cytochrome bd oxidase**

348 Electrons from Succinate dehydrogenases, move into the quinone pool, ready for transfer to  
349 the third and fourth complexes Cytochrome bc1-aa3 (*qcrABC* and *ctaBCDE*), during aerobic  
350 respiration, when oxygen is abundant, and to the less efficient cytochrome bd oxidase  
351 (*cydABCD*) when oxygen is limited (Figure 5).

352 The bc1-aa3 complexes are the major respiratory route in mycobacteria under standard  
353 aerobic conditions and are essential for growth where they play a key role in oxidative  
354 phosphorylation and electron transport that yields more ATP (33, 88), yet in our analysis, we  
355 detected potentially harmful mutations in *qcrC* and *ctaB* of the bc1-aa3 complexes in MAF  
356 lineages and intact gene complexes in MTB lineages (Figure 4 and Figure 5). To the best of our  
357 knowledge, this is the first work demonstrating that the critical bc1-aa3 complex is mutated  
358 in MAF lineages. This is perhaps crucial to understanding the difference in energy metabolism,  
359 particularly oxidative phosphorylation, between the MTB and MAF lineages, especially  
360 because MAF lineages preferentially grow microaerobically (15, 84, 89-91) and significantly  
361 under-express the dormancy regulon required for adaptation to oxygen limitation (15).  
362 Notably, the Imidazopyridine amide in Phase 2 clinical trials, Telacebec (Q203), inhibits *qcrB*  
363 of Cytochrome bc1, further emphasizing the importance of this complex for the survival of  
364 MTB. Therefore, the predicted harmful mutations we found in *qcrC*, the heme of the  
365 cytochrome bc1-complex, in MAF L6 (Figure 4 and Figure 5) likely impairs aerobic respiration  
366 and growth in this lineage severely, given that *qcrC*, like *qcrB*, is essential for survival (86).  
367 Similarly, *M. smegmatis* strains that had mutations in the bc1-aa3 complex were significantly  
368 growth impaired, confirming the essentiality of the bc1-aa3 respiratory pathway for  
369 mycobacterial growth. Recently, it was also confirmed that *M. tuberculosis* requires the bc1-  
370 aa3 complex to attain optimal growth rates and high titres in mice (83).

371 Taken together, our analysis provides further support for the view that MAF is adapted to a  
372 distinct niche, less dependent on aerobic respiration and more adapted to a microaerobic

373 lifestyle (15). Reasons for this potential niche adaptation and the benefit to the pathogen in  
374 its interaction with its host should be investigated further.

375 Ultimately, with an impaired bc1-aa3 complex, ATP yield will be reduced overall. This is likely  
376 the case in MAF lineages. Therefore, we postulate that ATP yield through oxidative  
377 phosphorylation in the MAF lineages is lower compared to the MTB lineages.

### 378 **3.2.4 ATP Synthase**

379 The F<sub>1</sub>-F<sub>0</sub> ATP synthase itself, the target for Bedaquiline (54, 92), is rather conserved in the  
380 different lineages. However, in MAF L5 and MTB L2 we detected potentially harmful  
381 mutations in *atp* genes (Table 2). The F<sub>1</sub>-F<sub>0</sub> ATP synthase operon is encoded by *atpIBEFHAGDC*  
382 and is required for survival as all genes in the operon are essential (71, 93). A defective ATP  
383 synthase may coincide with the microaerophilic lifestyle of MAF. However, for MTB L2, it is  
384 not clear what the advantage is for acquiring mutations in genes encoding ATP synthase.  
385 Interestingly though, compared to MTB L4, MTB L2 was found to have a lower growth rate  
386 (79).

### 387 **3.2.5 Fumarate reductase**

388 The branched respiratory chain of *the* MTBC permits anaerobic survival. During hypoxic or  
389 anaerobic conditions when oxygen is limited, Fumarate reductase (FRD, *frdABCD*) and Nitrate  
390 reductase (NAR, *narGHJI*) can serve as terminal electron acceptors to maintain the membrane  
391 potential. Therefore, these enzymes are critical. Moreover, further studies of *sdh* suggested  
392 that FRD could partially compensate for a lack of SDH activity (94). Defects in any of the  
393 subunits of *frd* could limit the overall function of the FRD complex. Notably, the attenuated  
394 strain H37Ra grown under low-oxygen conditions showed a lag in gene expression of *frdA* and  
395 *frdB* (95). The mutations we found in *frdA* and *frdB* in MAF L5 may be related to the adaptation  
396 of this lineage to a hypoxic or microaerophilic lifestyle. Therefore, the effect of mutations on  
397 gene function in MAF L5 and MTB L4 sublineage, Haarlem, should be determined  
398 experimentally.

### 399 **3.2.6 Alanine dehydrogenase and Proline dehydrogenase**

400 Other key dehydrogenases that contribute to redox balance of NADH for initiation of electron  
401 transport were also mutated in the MAF lineages (Figure 4 and Figure 5), indicating potential

402 redox imbalance in MAF lineages with the likelihood to impede electron transport. From our  
403 analysis, all MAF lineages had potentially harmful mutations in Alanine dehydrogenase (*ald*)  
404 and all MAF L5 had potentially harmful mutations in Proline dehydrogenase (*pruB*). Proline  
405 dehydrogenase is associated with the adaptation to hypoxia, slow growth rate and is essential  
406 for growth (71, 93, 96, 97). Alanine dehydrogenase has been shown to play a role in redox  
407 balance during low oxygen conditions and the downshift of *M. tuberculosis* to the state of  
408 nonreplicating persistence. *ald* mutants had altered NADH/NAD ratios and significant delays  
409 in growth resumption after reaeration. Additionally, induction of *ald* rescued the bc1-aa3  
410 complex mutant while its disruption made the growth defect of the mutant worse (97, 98).

411 Given that *ald* and the bc1-aa3 complex were mutated in all MAF in our analysis, MAF lineages  
412 are most probably natural mutants of *ald* and the bc1-aa3 complex. It is possible that these  
413 mutations in the MAF lineages contribute significantly to their slower growth compared to  
414 MTB due to impaired energy production. Moreover, these polymorphisms further support  
415 the adaptation of MAF to a hypoxic niche.

416

### 417 **3.3 Additional Mutations and similarities between MTBC lineages in the Central** 418 **Carbon Metabolic Pathway and Electron Transport Chain**

419 We detected several other mutations in genes of the Central Carbon Metabolic pathway and  
420 Electron Transport Chain that could potentially impact on enzyme function (Supplementary  
421 File S5). However, their PROVEAN scores were above the cut-off for harmful mutations and  
422 thus any impact may be slight or only due to neutral evolution. *cydB* and *narG*, highly  
423 important genes in the Electron Transport Chain also had several mutations, but none  
424 predicted to be potentially harmful (Supplementary File S5).

425 For multiple genes in the Electron Transport Chain and the Central Carbon Metabolic  
426 pathway, we either found the same mutation occurring in the same gene or different  
427 mutations occurring in the same gene in the different MTBC lineages. These mutations may  
428 confer a selective advantage and/or contribute to adaptation (Supplementary File S5).

429 Of these, only those mutations detected in *pca* in MTB L3 and MAF L5, those detected in *icl2a*  
430 and those found in *ndhA* are potentially harmful.

431 Overall, more similarities occurred between MTB L1, MTB L3 and the MAF lineages. This is  
432 interesting as the MAF lineages, MTB L1 and L3 lineages all reportedly grow relatively slower  
433 than the MTB L2 and L4 lineages (14, 67, 79, 80, 99). We postulate that the slower growth  
434 rate of these lineages and the similarities we observe in their metabolic pathways, may be  
435 linked to their similar migration and dispersal patterns in Africa and Eurasia (100), where L2  
436 and L4 have become widely dispersed, while L5, L6, and L7, had more geographically  
437 restricted expansion, adapting to more specific hosts. This may have influenced niche  
438 adaptation, where L2 and L4, in line with increased dispersion and range expansion, also  
439 increased their replicative/growth capacity and ability to transmit, while the more host  
440 restricted lineages maintained a lower replicative/growth potential in line with expansion in  
441 situ.

442

### 443 **3.4 Limitations**

444 Limitations of our analysis include the small sample size of MAF L5 analyzed. In the Gambia  
445 and other countries in Western West Africa, the prevalence of L5 is significantly lower than  
446 L6 (36). In our isolation of the 289 MAF strains included in this study, only 3 from The Gambia  
447 were MAF L5. However, to ensure that the mutations we detected in L5 from The Gambia  
448 were more representative of the MAF L5 lineage, we included L5 from Nigeria (Eastern West  
449 Africa), where the prevalence of L5 is high and L6 is significantly less likely to be isolated (101).  
450 Another limitation is that we did not experimentally confirm any of our in silico phenotype  
451 predictions.

452

## 453 **4 Conclusion**

454 In this comparative analysis, we describe genomic differences between the MTB and MAF  
455 lineages in genes encoding enzymes of the Electron Transport Chain and the Central Carbon  
456 Metabolic pathway, which may explain the differences in the clinical- and in vitro phenotype  
457 described for the MAF and MTB lineages. In vitro, MAF lineages grow significantly slower than  
458 MTB lineages and MAF L6 is, clinically, less virulent than MTB L4, as evidenced by significantly  
459 lower progression of MAF L6 infected individuals to active TB disease (11). Again, in vitro, MAF



460 lineages show microaerobic growth and clinically, are associated with extrapulmonary  
461 disease, implying a preference for regions with low oxygen (10, 15). Furthermore, MAF L6  
462 more commonly causes disease in immunocompromised persons, implying a more  
463 opportunistic pathogen (12, 13). Generally, it appears from our analysis that compared to  
464 MTB lineages, MAF lineages had the most mutated Central Carbon Metabolic and Electron  
465 Transport Pathways, with mutations occurring in critical components of each pathway. The  
466 combined effect of a defective Carbon Metabolic Pathway and Electron Transport Chain in  
467 MAF lineages, likely contributes to the reduced fitness of the MAF lineages. We speculate that  
468 our findings may contribute to 1 - the slower growth of MAF lineages, 2 - relative attenuation  
469 of the MAF L6 lineage compared to MTB lineages and 3 - host specificity to West Africans.

470 It is intriguing that in the different MTBC lineages multiple harmful mutations occurred in the  
471 same gene. These similarities largely found in MTB lineages 1, 2, 3 and the MAF lineages,  
472 indicates there may be a selective advantage for this. Interestingly, these lineages, compared  
473 to MTB L4 strains, have been associated with slower growth and cytokine induction patterns  
474 suggestive of immune evasion (8, 14, 67, 79-81, 99, 102, 103).

475 If the potentially harmful mutations we report on in this analysis affect energy metabolism in  
476 the different MTBC lineages, fitness will differ and ultimately the infection and transmission  
477 potential of these lineages. Therefore, our findings are not only relevant for TB product  
478 development but also for transmission studies and interventions. The literature already  
479 provides credence to and evidence for our hypothesis (9, 81, 104, 105).

## 480 **4.1 Future Proposed Investigations**

### 481 **4.1.1 Functional Studies**

482 Significant genomic differences between MTB and MAF lineages presented in this analysis  
483 warrant further studies in order to properly characterize the regulatory network of MAF.  
484 Recently, the regulatory network of H37Rv (MTB L4) was characterized yet what pertains to  
485 MAF lineages is not clearly defined, even though it has been shown that master regulators  
486 like *PhoPR* and *Rv0081* as well as the DosR regulon are underexpressed and/or mutated in  
487 MAF (15, 106-108). It is possible that the PhoPR system controls other components of the  
488 respiratory and central metabolic pathway although this is yet to be shown. We suspect that  
489 the potentially harmful mutations we report on will produce different growth phenotypes

490 (Table 3). Therefore, we propose functional genomic assays followed subsequently by in vitro  
491 and in vivo characterization of mutants to confirm the contribution to growth and survival  
492 that each gene makes. Such studies on the MAF lineages are limited, but not for MTB,  
493 particularly the generalist MTB L4. Recent studies provide data describing functional  
494 consequences of synonymous SNPs (109-111), i.e. caution needs to be taken in inferring the  
495 relative significance or impact of observed genomic mutations from sequencing data alone.  
496 Therefore, further studies to correlate genotype with phenotype are necessary and our  
497 findings serve as a prelude to such experimental studies.

#### 498 **4.1.2 Investigate Bioenergetics in MAF lineages**

499 It is highly plausible that adaptation of MAF lineages to growth under low oxygen  
500 (microaerobic) conditions could be a strategy to escape the harmful effects of ROS  
501 generated as electrons leak from a defective respiratory chain and react with built up  
502 oxygen (112). Moreover, reduced aerobic respiration or oxygen consumption in the MAF  
503 lineages could potentially affect the sensitivity of rapid diagnostics like the automated MGIT  
504 960 system, that depends on oxygen consumption to detect growth (113). Interestingly, the  
505 percentage of MAF in certain parts of West and Central Africa was reported to have  
506 suddenly and sharply declined over the last decade (4, 114-117), which could possibly be  
507 due to the introduction and use of new diagnostics like the MGIT 960 system. Of note, we  
508 recently detected, in a retrospective analysis based on genotyping, that 84% of strains that  
509 did not grow in the MGIT 960 system were MAF L6 (Ofori-Anyinam *et al.*, unpublished).  
510 Since growth and survival, driven by nutrient and energy metabolism, sustain pathogen  
511 transmission, and given that the success of drugs and phenotypic diagnostics rely on  
512 metabolic properties of the bacteria, understanding metabolism in these bacteria is  
513 essential. We hypothesize that MAF lineages generate less ATP and are more exposed to  
514 ROS than MTB lineages (Table 3). Therefore, we propose studies to investigate energy  
515 metabolism in MAF lineages relative to the MTB lineages, including whether MAF lineages  
516 are more exposed to ROS during growth.

#### 517 **4.1.3 Host Genetics**

518 One common feature of host specificity is genomic decay. Genomes of specialists usually  
519 show signs of genome decay evidenced by gene deletions or gene inactivation via point  
520 mutations. A driving force for the accumulation of mutations in some key electron transport

521 and carbon metabolism genes in the specialist/host-restricted MAF lineages could indicate  
522 adaptation of the MAF lineages to a specific host, West Africans, or a niche within the host,  
523 due to altered or loss of function of these genes. This potential niche adaptation could be  
524 driven by a precise feature of the host environment that favors the association between MAF  
525 lineages and West Africans such as has been described for some diseases (118). Some findings  
526 have been made, including MAF lineage-specific mutations in genes and pseudogenes  
527 involved in vitamin B12 and vitamin B3 metabolism, important cofactor biosynthetic  
528 pathways for many cellular functions. Unlike MAF though, MTB is fully capable of synthesizing  
529 vitamin B12. Therefore, it has been suggested that the mutations in the vitamin B12 pathway  
530 of the MAF lineages may affect their host range to West Africans. According to a study in the  
531 United States, black persons reportedly have higher levels of vitamin B12 relative to other  
532 ethnicities (8, 10, 119-121). Future studies should investigate the molecular mechanisms  
533 underlying host specificity.

534

## 535 **5 Supplementary Information**

536 Supplementary File S1

537 Supplementary File S2

538 Supplementary File S3

539 Supplementary File S4

540 Supplementary File S5

541

## 542 **6 Author Contributions**

543 BO, FG, BdJ and CM designed the study. BO, FG, AR, TJ, BS and CM undertook analyses. BO,  
544 BdJ, FG and CM wrote the manuscript. All authors contributed discussion and reviewed the  
545 final manuscript.

546

547 **7 Competing financial interests**

548 The authors declare no competing financial interests.

549

550 **8 Funding**

551 This work was supported by the European Research Council-INTERRUPTB starting grant  
552 nr.311725 (to Bdj, FG, CM, LR, BO, MA) and The UK Medical Research Council and the  
553 European & Developing Countries Clinical Trials Partnership (EDCTP) Grant No. CB. 2007.  
554 41700.007.

555

556 **9 Acknowledgments**

557 The authors thank all study participants and colleagues for their contribution to the present  
558 analysis.

559

560 **References**

- 561 1. Brosch R, Gordon SV, Marmiesse M, Brodin P, Buchrieser C, Eglmeier K, et al. A new  
562 evolutionary scenario for the *Mycobacterium tuberculosis* complex. Proceedings of the national  
563 academy of Sciences. 2002;99(6):3684-9.  
564 2. Comas I, Coscolla M, Luo T, Borrell S, Holt KE, Kato-Maeda M, et al. Out-of-Africa migration  
565 and Neolithic coexpansion of *Mycobacterium tuberculosis* with modern humans. Nature genetics.  
566 2013;45(10):1176-82.  
567 3. Gagneux S, DeRiemer K, Van T, Kato-Maeda M, de Jong BC, Narayanan S, et al. Variable host-  
568 pathogen compatibility in *Mycobacterium tuberculosis*. Proceedings of the National Academy of  
569 Sciences of the United States of America. 2006;103(8):2869-73.  
570 4. Michel KG, Guislaine R, Serge PD, Sanou A, Antoinette K, Adama O, et al. Spoligotyping of  
571 *Mycobacterium africanum*, Burkina Faso. Emerging Infectious Disease journal.  
572 2012;18(1):117.  
573 5. Coscolla M, Gagneux S. Consequences of genomic diversity in *Mycobacterium tuberculosis*.  
574 Semin Immunol. 2014;26.

- 575 6. Bentley SD, Comas I, Bryant JM, Walker D, Smith NH, Harris SR. The Genome of  
576 *Mycobacterium Africanum* West African 2 Reveals a Lineage-Specific Locus and Genome Erosion  
577 Common to the *M. tuberculosis* Complex. *PLoS Negl Trop Dis*. 2012;6.
- 578 7. Mostowy S, Onipede A, Gagneux S, Niemann S, Kremer K, Desmond EP, et al. Genomic  
579 analysis distinguishes *Mycobacterium africanum*. *Journal of clinical microbiology*. 2004;42(8):3594-9.
- 580 8. Winglee K, Manson McGuire A, Maiga M, Abeel T, Shea T, Desjardins CA, et al. Whole  
581 Genome Sequencing of *Mycobacterium africanum* Strains from Mali Provides Insights into the  
582 Mechanisms of Geographic Restriction. *PLoS neglected tropical diseases*. 2016;10(1):e0004332.
- 583 9. Asare P, Asante-Poku A, Prah DA, Borrell S, Osei-Wusu S, Otchere ID, et al. Reduced  
584 transmission of *Mycobacterium africanum* compared to *Mycobacterium tuberculosis* in urban West  
585 Africa. *International Journal of Infectious Diseases*. 2018;73:30-42.
- 586 10. Sharma A, Bloss E, Heilig CM, Click ES. Tuberculosis Caused by *Mycobacterium africanum*,  
587 United States, 2004-2013. *Emerging infectious diseases*. 2016;22(3):396-403.
- 588 11. De Jong BC, Hill PC, Aiken A, Awine T, Antonio M, Adetifa IM. Progression to Active  
589 Tuberculosis, but Not Transmission, Varies by *Mycobacterium tuberculosis* Lineage in The Gambia. *J*  
590 *Infect Dis*. 2008;198.
- 591 12. de Jong BC, Hill PC, Brookes RH, Otu JK, Peterson KL, Small PM, et al. *Mycobacterium*  
592 *africanum*: a new opportunistic pathogen in HIV infection? *Aids*. 2005;19(15):1714-5.
- 593 13. de Jong BC, Adetifa I, Walther B, Hill PC, Antonio M, Ota M, et al. Differences between  
594 tuberculosis cases infected with *Mycobacterium africanum*, West African type 2, relative to Euro-  
595 American *Mycobacterium tuberculosis*: an update. *FEMS immunology and medical microbiology*.  
596 2010;58(1):102-5.
- 597 14. Gehre F, Otu J, DeRiemer K, de Sessions PF, Hibberd ML, Mulders W, et al. Deciphering the  
598 growth behaviour of *Mycobacterium africanum*. *PLoS neglected tropical diseases*. 2013;7(5):e2220.
- 599 15. Ofori-Anyinam B, Dolganov G, Van T, Davis JL, Walter ND, Garcia BJ, et al. Significant under  
600 expression of the DosR regulon in *M. tuberculosis* complex lineage 6 in sputum. *Tuberculosis*.  
601 2017;104:58-64.
- 602 16. Leistikow RL, Morton RA, Bartek IL, Frimpong I, Wagner K, Voskuil MI. The *Mycobacterium*  
603 *tuberculosis* DosR regulon assists in metabolic homeostasis and enables rapid recovery from  
604 nonrespiring dormancy. *Journal of bacteriology*. 2010;192(6):1662-70.
- 605 17. Lew JM, Kapopoulou A, Jones LM, Cole ST. TubercuList--10 years after. *Tuberculosis*  
606 (Edinburgh, Scotland). 2011;91(1):1-7.
- 607 18. Cook GM, Berney M, Gebhard S, Heinemann M, Cox RA, Danilchanka O, et al. Physiology of  
608 mycobacteria. *Advances in microbial physiology*. 2009;55:81-319.
- 609 19. Warner DF. *Mycobacterium tuberculosis* metabolism. *Cold Spring Harbor perspectives in*  
610 *medicine*.5(4):a021121.
- 611 20. David HL, Jahan MT, Jumin A, Grandry J, Lehman EH. Numerical taxonomy analysis of  
612 *Mycobacterium africanum*. *Int J Syst Bacteriol*. 1978;28.
- 613 21. Dubos RJ. The effect of lipids and serum albumin on bacterial growth. *The Journal of*  
614 *experimental medicine*. 1947;85(1):9.
- 615 22. Edson N. The intermediary metabolism of the mycobacteria. *Bacteriological reviews*.  
616 1951;15(3):147.
- 617 23. Goldman DS. ENZYME SYSTEMS IN THE MYCOBACTERIA XV. Initial Steps in the Metabolism of  
618 Glycerol. *Journal of bacteriology*. 1963;86(1):30-7.
- 619 24. Hunter G. The oxidation of glycerol by mycobacteria. *Biochemical Journal*. 1953;55(2):320.
- 620 25. Merrill MH. Studies on Carbon Metabolism of Organisms of the Genus *Mycobacterium*: II.  
621 Utilization of Organic Compounds in a Synthetic Medium. *Journal of bacteriology*. 1931;21(5):361.
- 622 26. Pattyn SR, Portaels F, Spanoghe L, Magos J. Further studies on African strains of  
623 *Mycobacterium tuberculosis*: comparison with *M. bovis* and *M. microti*. *Annales des Societes belges*  
624 *de medecine tropicale, de parasitologie, et de mycologie*. 1970;50.

- 625 27. Tepper BS. Differences in the utilization of glycerol and glucose by *Mycobacterium phlei*.  
626 Journal of bacteriology. 1968;95(5):1713-7.
- 627 28. Youmans AS, Youmans GP. STUDIES ON THE METABOLISM OF MYCOBACTERIUM  
628 TUBERCULOSIS IV.: The Effect of Fatty Acids on the Growth of *M. tuberculosis* var. hominis1. Journal  
629 of bacteriology. 1954;67(6):731.
- 630 29. Youmans GP, Youmans AS. STUDIES ON THE METABOLISM OF MYCOBACTERIUM  
631 TUBERCULOSIS I.: The Effect of Carbohydrates and Alcohols on the Growth of *Mycobacterium*  
632 *tuberculosis* var. hominis1. Journal of bacteriology. 1953;65(1):92.
- 633 30. Pattyn SR, Portaels F, Spanoghe L, Magos J. Further studies on African strains of  
634 *Mycobacterium tuberculosis*: comparison with *M. bovis* and *M. microti*. Annales des Societes belges  
635 de medecine tropicale, de parasitologie, et de mycologie. 1970;50(2):211-27.
- 636 31. de Medeiros D, Castets M, Diop S. [Comparative morphological aspects of *Mycobacterium*  
637 *tuberculosis*, classical type, and *Mycobacterium africanus* (preliminary note)]. Bulletin de la Societe  
638 medicale d'Afrique noire de langue francaise. 1973;18(4):477-84.
- 639 32. Baughn AD, Rhee KY. Metabolomics of Central Carbon Metabolism in *Mycobacterium*  
640 *tuberculosis*. Microbiology spectrum. 2014;2(3).
- 641 33. Cook GM, Hards K, Vilcheze C, Hartman T, Berney M. Energetics of Respiration and Oxidative  
642 Phosphorylation in Mycobacteria. Microbiology spectrum. 2014;2(3).
- 643 34. Keating LA, Wheeler PR, Mansoor H, Inwald JK. The pyruvate requirement of some members  
644 of the *Mycobacterium tuberculosis* complex is due to an inactive pyruvate kinase: implications for in  
645 vivo growth. Mol Microbiol. 2005;56.
- 646 35. Gehre F, Otu J, Kendall L, Forson A, Kwara A, Kudzawu S, et al. The emerging threat of pre-  
647 extensively drug-resistant tuberculosis in West Africa: preparing for large-scale tuberculosis research  
648 and drug resistance surveillance. BMC Medicine. 2016;14(1):160.
- 649 36. Gehre F, Kumar S, Kendall L, Ejo M, Secka O, Ofori-Anyinam B, et al. A Mycobacterial  
650 Perspective on Tuberculosis in West Africa: Significant Geographical Variation of *M. africanum* and  
651 Other *M. tuberculosis* Complex Lineages. PLoS neglected tropical diseases. 2016;10(3):e0004408.
- 652 37. Singhal N, Sharma P, Kumar M, Joshi B, Bisht D. Analysis of intracellular expressed proteins  
653 of *Mycobacterium tuberculosis* clinical isolates. Proteome Science. 2012;10(1):14.
- 654 38. Hosek J, Svastova P, Moravkova M, Pavlik I, Bartos M. Methods of mycobacterial DNA  
655 isolation from different biological material: a review. Veterinarni medicina. 2006;51(5):180-92.
- 656 39. Li H. Aligning sequence reads, clone sequences and assembly contigs with BWA-MEM. arXiv  
657 preprint arXiv:13033997. 2013.
- 658 40. Li H, Handsaker B, Wysoker A, Fennell T, Ruan J, Homer N, et al. The Sequence  
659 Alignment/Map format and SAMtools. Bioinformatics (Oxford, England). 2009;25(16):2078-9.
- 660 41. Garrison E, Marth G. Haplotype-based variant detection from short-read sequencing. arXiv  
661 preprint arXiv:12073907. 2012.
- 662 42. Cingolani P, Platts A, Wang LL, Coon M, Nguyen T, Wang L, et al. A program for annotating  
663 and predicting the effects of single nucleotide polymorphisms, SnpEff: SNPs in the genome of  
664 *Drosophila melanogaster* strain w1118; iso-2; iso-3. Fly. 2012;6(2):80-92.
- 665 43. Coll F, McNerney R, Guerra-Assuncao JA, Glynn JR, Perdigao J, Viveiros M, et al. A robust SNP  
666 barcode for typing *Mycobacterium tuberculosis* complex strains. Nature communications.  
667 2014;5:4812.
- 668 44. Feuerriegel S, Schleusener V, Beckert P, Kohl TA, Miotto P, Cirillo DM, et al. PhyResSE: a Web  
669 Tool Delineating *Mycobacterium tuberculosis* Antibiotic Resistance and Lineage from Whole-Genome  
670 Sequencing Data. Journal of clinical microbiology. 2015;53(6):1908-14.
- 671 45. Stamatakis A. RAxML version 8: a tool for phylogenetic analysis and post-analysis of large  
672 phylogenies. Bioinformatics (Oxford, England). 2014;30(9):1312-3.
- 673 46. Leache AD, Banbury BL, Felsenstein J, de Oca AN, Stamatakis A. Short Tree, Long Tree, Right  
674 Tree, Wrong Tree: New Acquisition Bias Corrections for Inferring SNP Phylogenies. Systematic  
675 biology. 2015;64(6):1032-47.

- 676 47. Lewis PO. A likelihood approach to estimating phylogeny from discrete morphological  
677 character data. *Systematic biology*. 2001;50(6):913-25.
- 678 48. Letunic I, Bork P. Interactive Tree Of Life (iTOL): an online tool for phylogenetic tree display  
679 and annotation. *Bioinformatics (Oxford, England)*. 2007;23(1):127-8.
- 680 49. Choi Y. A fast computation of pairwise sequence alignment scores between a protein and a  
681 set of single-locus variants of another protein. *Proceedings of the ACM Conference on*  
682 *Bioinformatics, Computational Biology and Biomedicine; Orlando, Florida*. 2382989: ACM; 2012. p.  
683 414-7.
- 684 50. Choi Y, Chan AP. PROVEAN web server: a tool to predict the functional effect of amino acid  
685 substitutions and indels. *Bioinformatics (Oxford, England)*. 2015;31(16):2745-7.
- 686 51. Choi Y, Sims GE, Murphy S, Miller JR, Chan AP. Predicting the Functional Effect of Amino Acid  
687 Substitutions and Indels. *PLoS one*. 2012;7(10):e46688.
- 688 52. Kumar P, Henikoff S, Ng PC. Predicting the effects of coding non-synonymous variants on  
689 protein function using the SIFT algorithm. *Nature protocols*. 2009;4(7):1073-81.
- 690 53. Stucki D, Brites D, Jeljeli L, Coscolla M, Liu Q, Trauner A, et al. *Mycobacterium tuberculosis*  
691 lineage 4 comprises globally distributed and geographically restricted sublineages. *Nature genetics*.  
692 2016;48(12):1535-43.
- 693 54. Andries K, Verhasselt P, Guillemont J, Gohlmann HW, Neefs JM, Winkler H, et al. A  
694 diarylquinoline drug active on the ATP synthase of *Mycobacterium tuberculosis*. *Science (New York,*  
695 *NY)*. 2005;307(5707):223-7.
- 696 55. Koul A, Dendouga N, Vergauwen K, Molenberghs B, Vranckx L, Willebrords R, et al.  
697 Diarylquinolines target subunit c of mycobacterial ATP synthase. *Nature chemical biology*.  
698 2007;3(6):323-4.
- 699 56. Pethe K, Bifani P, Jang J, Kang S, Park S, Ahn S, et al. Discovery of Q203, a potent clinical  
700 candidate for the treatment of tuberculosis. *Nat Med*. 2013;19(9):1157-60.
- 701 57. Barry VC, Belton JG, Conalty ML, Denneny JM, Edward DW, O'Sullivan JF, et al. A new series  
702 of phenazines (rimino-compounds) with high antituberculosis activity. *Nature*. 1957;179(4568):1013-  
703 5.
- 704 58. Lechartier B, Cole ST. Mode of Action of Clofazimine and Combination Therapy with  
705 Benzothiazinones against *Mycobacterium tuberculosis*. *Antimicrobial*  
706 *Agents and Chemotherapy*. 2015;59(8):4457.
- 707 59. Lewis JM, Sloan DJ. The role of delamanid in the treatment of drug-resistant tuberculosis.  
708 *Therapeutics and clinical risk management*. 2015;11:779-91.
- 709 60. Xavier AS, Lakshmanan M. Delamanid: A new armor in combating drug-resistant  
710 tuberculosis. *Journal of pharmacology & pharmacotherapeutics*. 2014;5(3):222-4.
- 711 61. Yano T, Kassovska-Bratinova S, Teh JS, Winkler J, Sullivan K, Isaacs A, et al. Reduction of  
712 clofazimine by mycobacterial type 2 NADH:quinone oxidoreductase: a pathway for the generation of  
713 bactericidal levels of reactive oxygen species. *The Journal of biological chemistry*.  
714 2011;286(12):10276-87.
- 715 62. Van Deun A, Decroo T, Piubello A, de Jong BC, Lynen L, Rieder HL. Principles for constructing  
716 a tuberculosis treatment regimen: the role and definition of core and companion drugs. *The*  
717 *international journal of tuberculosis and lung disease : the official journal of the International Union*  
718 *against Tuberculosis and Lung Disease*. 2018;22(3):239-45.
- 719 63. Cohen T, Colijn C, Murray M. Modeling the effects of strain diversity and mechanisms of  
720 strain competition on the potential performance of new tuberculosis vaccines. *Proceedings of the*  
721 *National Academy of Sciences*. 2008;105(42):16302.
- 722 64. Gagneux S, Small PM. Global phylogeography of *Mycobacterium tuberculosis* and  
723 implications for tuberculosis product development. *Lancet Infect Dis*. 2007;7.

- 725 65. Homolka S, Niemann S, Russell DG, Rohde KH. Functional Genetic Diversity among  
726 *Mycobacterium tuberculosis* Complex Clinical Isolates: Delineation of Conserved Core and Lineage-  
727 Specific Transcriptomes during Intracellular Survival. *PLoS pathogens*. 2010;6(7):e1000988.
- 728 66. Ofori-Anyinam B, Kanuteh F, Agbla SC, Adetifa I, Okoi C, Dolganov G, et al. Impact of the  
729 *Mycobacterium africanum* West Africa 2 Lineage on TB Diagnostics in West Africa: Decreased  
730 Sensitivity of Rapid Identification Tests in The Gambia. *PLoS neglected tropical diseases*.  
731 2016;10(7):e0004801.
- 732 67. Sanoussi CN, Affolabi D, Rigouts L, Anagonou S, de Jong B. Genotypic characterization  
733 directly applied to sputum improves the detection of *Mycobacterium africanum* West African 1,  
734 under-represented in positive cultures. *PLoS neglected tropical diseases*. 2017;11(9):e0005900.
- 735 68. Sanoussi CN, de Jong BC, Odoun M, Arekpa K, Ali Ligali M, Bodi O, et al. Low sensitivity of the  
736 MPT64 identification test to detect lineage 5 of the *Mycobacterium tuberculosis* complex. *Journal of*  
737 *medical microbiology*. 2018;67(12):1718-27.
- 738 69. Iqbal IK, Bajeli S, Akela AK, Kumar A. Bioenergetics of *Mycobacterium*: An Emerging  
739 Landscape for Drug Discovery. *Pathogens*. 2018;7(1):24.
- 740 70. Rahi A, Matta SK, Dhiman A, Garhyan J, Gopalani M, Chandra S, et al. Enolase of  
741 *Mycobacterium tuberculosis* is a surface exposed plasminogen binding protein. *Biochimica et*  
742 *biophysica acta General subjects*. 2017;1861(1 Pt A):3355-64.
- 743 71. Griffin JE, Gawronski JD, Dejesus MA, Ioerger TR, Akerley BJ, Sasseti CM. High-resolution  
744 phenotypic profiling defines genes essential for mycobacterial growth and cholesterol catabolism.  
745 *PLoS pathogens*. 2011;7(9):e1002251.
- 746 72. Sasseti CM, Boyd DH, Rubin EJ. Genes required for mycobacterial growth defined by high  
747 density mutagenesis. *Molecular microbiology*. 2003;48(1):77-84.
- 748 73. Tuckman D, Donnelly RJ, Zhao FX, Jacobs WR, Jr., Connell ND. Interruption of the  
749 phosphoglucose isomerase gene results in glucose auxotrophy in *Mycobacterium smegmatis*. *Journal*  
750 *of bacteriology*. 1997;179(8):2724-30.
- 751 74. Phong WY, Lin W, Rao SP, Dick T, Alonso S, Pethe K. Characterization of phosphofructokinase  
752 activity in *Mycobacterium tuberculosis* reveals that a functional glycolytic carbon flow is necessary to  
753 limit the accumulation of toxic metabolic intermediates under hypoxia. *PloS one*. 2013;8(2):e56037.
- 754 75. Collins DM, Wilson T, Campbell S, Buddle BM, Wards BJ, Hotter G, et al. Production of  
755 avirulent mutants of *Mycobacterium bovis* with vaccine properties by the use of illegitimate  
756 recombination and screening of stationary-phase cultures. *Microbiology (Reading, England)*.  
757 2002;148(Pt 10):3019-27.
- 758 76. Liu K, Yu J, Russell DG. pckA-deficient *Mycobacterium bovis* BCG shows attenuated virulence  
759 in mice and in macrophages. *Microbiology (Reading, England)*. 2003;149(Pt 7):1829-35.
- 760 77. Munoz-Elias EJ, McKinney JD. *Mycobacterium tuberculosis* isocitrate lyases 1 and 2 are jointly  
761 required for in vivo growth and virulence. *Nat Med*. 2005;11(6):638-44.
- 762 78. Nandakumar M, Nathan C, Rhee KY. Isocitrate lyase mediates broad antibiotic tolerance in  
763 *Mycobacterium tuberculosis*. *Nature communications*. 2014;5:4306.
- 764 79. Sarkar R, Lenders L, Wilkinson KA, Wilkinson RJ, Nicol MP. Modern Lineages of  
765 *Mycobacterium tuberculosis* Exhibit Lineage-Specific Patterns of Growth and Cytokine Induction in  
766 Human Monocyte-Derived Macrophages. *PloS one*. 2012;7(8):e43170.
- 767 80. Tanveer M, Hasan Z, Kanji A, Hussain R, Hasan R. Reduced TNF- $\alpha$  and IFN- $\gamma$  responses to  
768 Central Asian strain 1 and Beijing isolates of *Mycobacterium tuberculosis* in comparison with H37Rv  
769 strain. *Transactions of The Royal Society of Tropical Medicine and Hygiene*. 2009;103(6):581-7.
- 770 81. Yimer SA, Norheim G, Namouchi A, Zegeye ED, Kinander W, Tønjum T, et al. &lt;span class=&quot;named-content genus-species&quot; id=&quot;named-content-  
771 1&quot;&gt;&lt;/span>&lt;/span> *Mycobacterium tuberculosis*&lt;/span>&lt;/span> Lineage 7 Strains Are Associated with  
772 Prolonged Patient Delay in Seeking Treatment for Pulmonary Tuberculosis in Amhara Region,  
773 Ethiopia. *Journal of clinical microbiology*. 2015;53(4):1301.



- 775 82. Vilcheze C, Weinrick B, Leung LW, Jacobs WR, Jr. Plasticity of *Mycobacterium tuberculosis*  
776 NADH dehydrogenases and their role in virulence. Proceedings of the National Academy of Sciences  
777 of the United States of America. 2018;115(7):1599-604.
- 778 83. Beites T, O'Brien K, Tiwari D, Engelhart CA, Walters S, Andrews J, et al. Plasticity of the  
779 *Mycobacterium tuberculosis* respiratory chain and its impact on tuberculosis drug development.  
780 Nature communications. 2019;10(1):4970-.
- 781 84. De Jong BC, Antonio M, Gagneux S. *Mycobacterium africanum*—Review of an Important  
782 Cause of Human Tuberculosis in West Africa. PLoS Negl Trop Dis. 2010;4.
- 783 85. Hartman T, Weinrick B, Vilchèze C, Berney M, Tufariello J, Cook GM, et al. Succinate  
784 dehydrogenase is the regulator of respiration in *Mycobacterium tuberculosis*. PLoS pathogens.  
785 2014;10(11):e1004510.
- 786 86. Minato Y, Gohl DM, Thiede JM, Chacón JM, Harcombe WR, Maruyama F, et al. Genome-wide  
787 assessment of *Mycobacterium tuberculosis*; conditionally essential metabolic  
788 pathways. bioRxiv. 2019:534289.
- 789 87. Goldberg I, Lonberg-Holm K, Bagley EA, Stieglitz B. Improved conversion of fumarate to  
790 succinate by *Escherichia coli* strains amplified for fumarate reductase. Applied and environmental  
791 microbiology. 1983;45(6):1838-47.
- 792 88. Matsoso LG, Kana BD, Crellin PK, Lea-Smith DJ, Pelosi A, Powell D, et al. Function of the  
793 cytochrome bc1-aa3 branch of the respiratory network in mycobacteria and network adaptation  
794 occurring in response to its disruption. Journal of bacteriology. 2005;187(18):6300-8.
- 795 89. Frothingham R, Strickland PL, Bretzel G, Ramaswamy S, Musser JM, Williams DL. Phenotypic  
796 and Genotypic Characterization of *Mycobacterium africanum* Isolates from West Africa. Journal of  
797 clinical microbiology. 1999;37(6):1921-6.
- 798 90. Niemann S, Richter E, Rusch-Gerdes S. Differentiation among members of the  
799 *Mycobacterium tuberculosis* complex by molecular and biochemical features: evidence for two  
800 pyrazinamide-susceptible subtypes of *M. bovis*. Journal of clinical microbiology. 2000;38(1):152-7.
- 801 91. Parsons LM, Brosch R, Cole ST, Somoskovi A, Loder A, Bretzel G, et al. Rapid and simple  
802 approach for identification of *Mycobacterium tuberculosis* complex isolates by PCR-based genomic  
803 deletion analysis. Journal of clinical microbiology. 2002;40(7):2339-45.
- 804 92. Trauner A, Sasseti CM, Rubin EJ. Genetic Strategies for Identifying New Drug Targets.  
805 Microbiology spectrum. 2014;2(4):Mgm2-0030-2013.
- 806 93. Zhang YJ, Ioerger TR, Huttenhower C, Long JE, Sasseti CM, Sacchettini JC, et al. Global  
807 Assessment of Genomic Regions Required for Growth in *Mycobacterium tuberculosis*. PLoS  
808 pathogens. 2012;8(9):e1002946.
- 809 94. Guest JR. Partial replacement of succinate dehydrogenase function by phage- and plasmid-  
810 specified fumarate reductase in *Escherichia coli*. Journal of general microbiology. 1981;122(2):171-9.
- 811 95. Li AH, Lam WL, Stokes RW. Characterization of genes differentially expressed within  
812 macrophages by virulent and attenuated *Mycobacterium tuberculosis* identifies candidate genes  
813 involved in intracellular growth. Microbiology (Reading, England). 2008;154(8):2291-303.
- 814 96. Berney M, Cook GM. Unique flexibility in energy metabolism allows mycobacteria to combat  
815 starvation and hypoxia. PloS one. 2010;5(1):e8614.
- 816 97. Giffin MM, Shi L, Gennaro ML, Sohaskey CD. Role of alanine dehydrogenase of  
817 *Mycobacterium tuberculosis* during recovery from hypoxic nonreplicating persistence. PloS one.  
818 2016;11(5):e0155522.
- 819 98. Jeong J-A, Park SW, Yoon D, Kim S, Kang H-Y, Oh J-I. Roles of Alanine Dehydrogenase and  
820 Induction of Its Gene in *Mycobacterium tuberculosis* under Respiration-  
821 Inhibitory Conditions. Journal of bacteriology. 2018;200(14):e00152-18.
- 822 99. Reiling N, Homolka S, Walter K, Brandenburg J, Niwinski L, Ernst M, et al. Clade-Specific  
823 Virulence Patterns of *Mycobacterium tuberculosis* Complex Isolates from West Africa.

- 825 content-1&quot;&gt;*Mycobacterium tuberculosis*&lt;/span&gt; Complex Strains in Human Primary  
826 Macrophages and Aerogenically Infected Mice. *mBio*. 2013;4(4):e00250-13.
- 827 100. O'Neill MB, Shockey A, Zarley A, Aylward W, Eldholm V, Kitchen A, et al. Lineage specific  
828 histories of *Mycobacterium tuberculosis* dispersal in Africa and Eurasia. *Molecular ecology*. 2019.
- 829 101. Molina-Moya B, Gomgnimbou MK, Spinasse L, Obasanya J, Oladimeji O, Dacombe R, et al.  
830 *Mycobacterium tuberculosis* complex genotypes circulating in Nigeria based on spoligotyping  
831 obtained from Ziehl-Neelsen stained slides extracted DNA. *PLoS neglected tropical diseases*.  
832 2018;12(2):e0006242.
- 833 102. Ates LS, Dippenaar A, Sayes F, Pawlik A, Bouchier C, Ma L, et al. Unexpected Genomic and  
834 Phenotypic Diversity of *Mycobacterium africanum* Lineage 5 Affects Drug Resistance, Protein  
835 Secretion, and Immunogenicity. *Genome Biology and Evolution*. 2018;10(8):1858-74.
- 836 103. Newton SM, Smith RJ, Wilkinson KA, Nicol MP, Garton NJ, Staples KJ, et al. A deletion  
837 defining a common Asian lineage of *Mycobacterium tuberculosis* associates with immune  
838 subversion. *Proceedings of the National Academy of Sciences of the United States of America*.  
839 2006;103(42):15594-8.
- 840 104. Albanna AS, Reed MB, Kotar KV, Fallow A, McIntosh FA, Behr MA, et al. Reduced  
841 Transmissibility of East African Indian Strains of *Mycobacterium tuberculosis*. *PloS one*.  
842 2011;6(9):e25075.
- 843 105. Nebenzahl-Guimaraes H, Verhagen LM, Borgdorff MW, Van Soolingen D. Transmission and  
844 progression to disease of *Mycobacterium tuberculosis* phylogenetic lineages in The Netherlands.  
845 *Journal of clinical microbiology*. 2015;53(10):3264-71.
- 846 106. Broset E, Martín C, Gonzalo-Asensio J. Evolutionary Landscape of the &lt;span  
847 class=&quot;named-content genus-species&quot; id=&quot;named-content-  
848 1&quot;&gt;*Mycobacterium tuberculosis*&lt;/span&gt; Complex from the Viewpoint of PhoPR:  
849 Implications for Virulence Regulation and Application to Vaccine Development. *mBio*.  
850 2015;6(5):e01289-15.
- 851 107. Gonzalo-Asensio J, Malaga W, Pawlik A, Astarie-Dequeker C, Passemar C, Moreau F, et al.  
852 Evolutionary history of tuberculosis shaped by conserved mutations in the PhoPR virulence  
853 regulator. *Proceedings of the National Academy of Sciences of the United States of America*.  
854 2014;111(31):11491-6.
- 855 108. Gonzalo-Asensio J, Mostowy S, Harders-Westerveen J, Huygen K, Hernandez-Pando R, Thole  
856 J, et al. PhoP: a missing piece in the intricate puzzle of *Mycobacterium tuberculosis* virulence. *PloS*  
857 *one*. 2008;3(10):e3496.
- 858 109. Capon F, Allen MH, Ameen M, Burden AD, Tillman D, Barker JN, et al. A synonymous SNP of  
859 the corneodesmosin gene leads to increased mRNA stability and demonstrates association with  
860 psoriasis across diverse ethnic groups. *Human molecular genetics*. 2004;13(20):2361-8.
- 861 110. Duan J, Wainwright MS, Comeran JM, Saitou N, Sanders AR, Gelernter J, et al. Synonymous  
862 mutations in the human dopamine receptor D2 (DRD2) affect mRNA stability and synthesis of the  
863 receptor. *Human molecular genetics*. 2003;12(3):205-16.
- 864 111. Golby P, Nunez J, Witney A, Hinds J, Quail MA, Bentley S, et al. Genome-level analyses of  
865 *Mycobacterium bovis* lineages reveal the role of SNPs and antisense transcription in differential gene  
866 expression. *BMC genomics*. 2013;14:710-.
- 867 112. Baez A, Shiloach J. Effect of elevated oxygen concentration on bacteria, yeasts, and cells  
868 propagated for production of biological compounds. *Microbial cell factories*. 2014;13:181-.
- 869 113. Siddiqi SaR-G, S. MGIT™ Procedure Manual, For BACTEC™ MGIT 960™ TB System  
870 (Also applicable for Manual MGIT), *Mycobacteria Growth Indicator Tube (MGIT)*  
871 *Culture and Drug Susceptibility Demonstration Projects*. 2006.
- 872 114. Godreuil S, Torrea G, Terru D, Chevenet F, Diagbouga S, Supply P, et al. First molecular  
873 epidemiology study of *Mycobacterium tuberculosis* in Burkina Faso. *Journal of clinical microbiology*.  
874 2007;45(3):921-7.

- 875 115. Groenheit R, Ghebremichael S, Svensson J, Rabna P, Colombatti R, Riccardi F, et al. The  
 876 Guinea-Bissau family of *Mycobacterium tuberculosis* complex revisited. PloS one. 2011;6(4):e18601.  
 877 116. Niobe-Eyangoh SN, Kuaban C, Sorlin P, Cunin P, Thonnon J, Sola C, et al. Genetic Biodiversity  
 878 of *Mycobacterium tuberculosis* Complex Strains from Patients with Pulmonary Tuberculosis in  
 879 Cameroon. Journal of clinical microbiology. 2003;41(6):2547-53.  
 880 117. Ouassa T, Borroni E, Loukou GY, Faye-Kette H, Kouakou J, Menan H, et al. High prevalence of  
 881 shared international type 53 among *Mycobacterium tuberculosis* complex strains in retreated  
 882 patients from Cote d'Ivoire. PloS one. 2012;7(9):e45363.  
 883 118. Campbell MC, Tishkoff SA. African genetic diversity: implications for human demographic  
 884 history, modern human origins, and complex disease mapping. Annual review of genomics and  
 885 human genetics. 2008;9:403-33.  
 886 119. Amouzou EK, Chabi NW, Adjalla CE, Rodriguez-Gueant RM, Feillet F, Villaume C, et al. High  
 887 prevalence of hyperhomocysteinemia related to folate deficiency and the 677C->T mutation of the  
 888 gene encoding methylenetetrahydrofolate reductase in coastal West Africa. The American journal of  
 889 clinical nutrition. 2004;79(4):619-24.  
 890 120. Gagneux S. Strain variation in the *Mycobacterium tuberculosis* complex: its role in biology,  
 891 epidemiology and control. Springer, Heidelberg. 2017.  
 892 121. Moore SE, Mansoor MA, Bates CJ, Prentice AM. Plasma homocysteine, folate and vitamin  
 893 B12 compared between rural Gambian and UK adults. British Journal of Nutrition. 2008;96(3):508-  
 894 15.

895

896 **Figure 1: Link between central carbon metabolism and the Electron Transport Chain.**  
 897 Reducing equivalents like NADH and FADH<sub>2</sub> enter into the Electron Transport Chain that  
 898 drives the production of high amounts of ATP for cellular processes

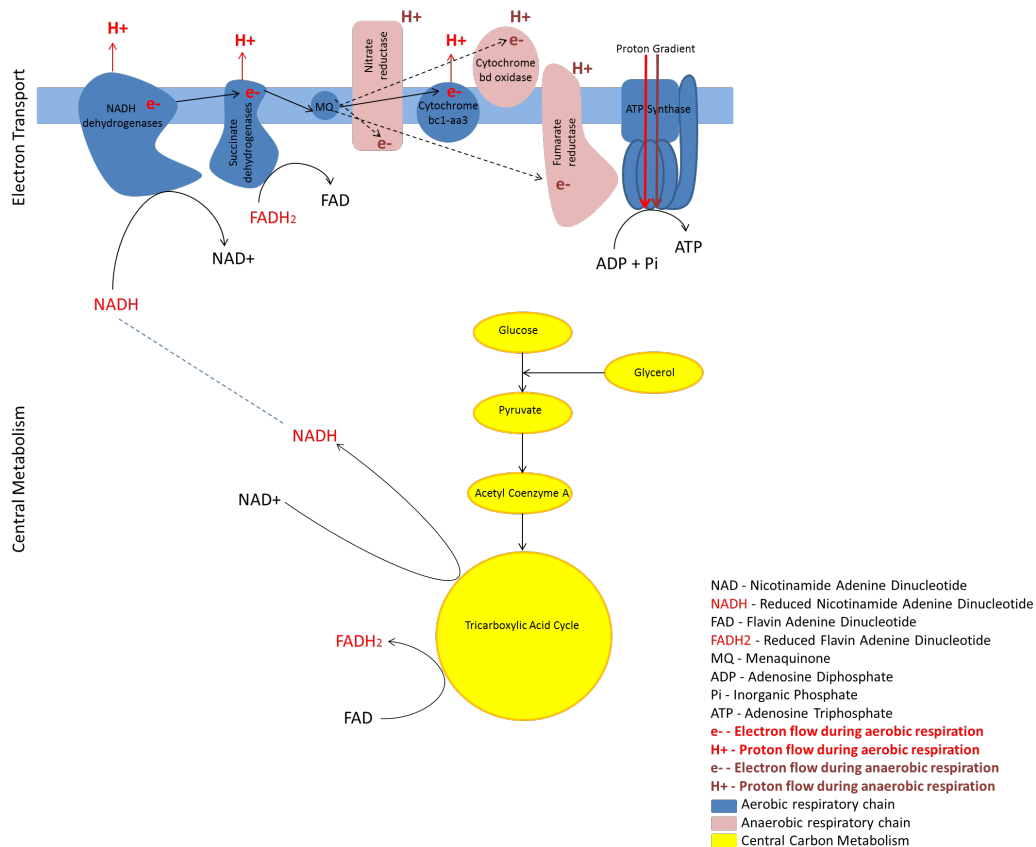

899

**Figure 2: Mutations detected in the Central Carbon Metabolic Pathway of a) MAF L6 and MAF L5 and b) MTB L4 Ghana, L4 Haarlem, L1, L3, L2, L4 Cameroon and L4 LAM.** Red and blue coloured bars represent nonsynonymous mutations detected in 50-100% of strains per lineage in the associated genes shown below each set of bars indicating mutations. Genes emboldened red have mutations detected predicted to be harmful in MAF lineages, genes emboldened blue have mutations detected predicted to be harmful in MTB lineages and genes emboldened purple have mutations detected predicted to be harmful in the same gene in MTB and MAF lineages. Grey bars indicate that no nonsynonymous and/or predicted harmful mutations were detected in the corresponding gene below each set of grey bars. First column colour indicates the lineage: a) MAF L6 (green) and MAF L5 (brown), b) MTB L4 Ghana (brown), L4 Haarlem (red), L1 (lilac), L3 (purple), L2 (blue), L4 Cameroon (pink) and L4 LAM (dark red).

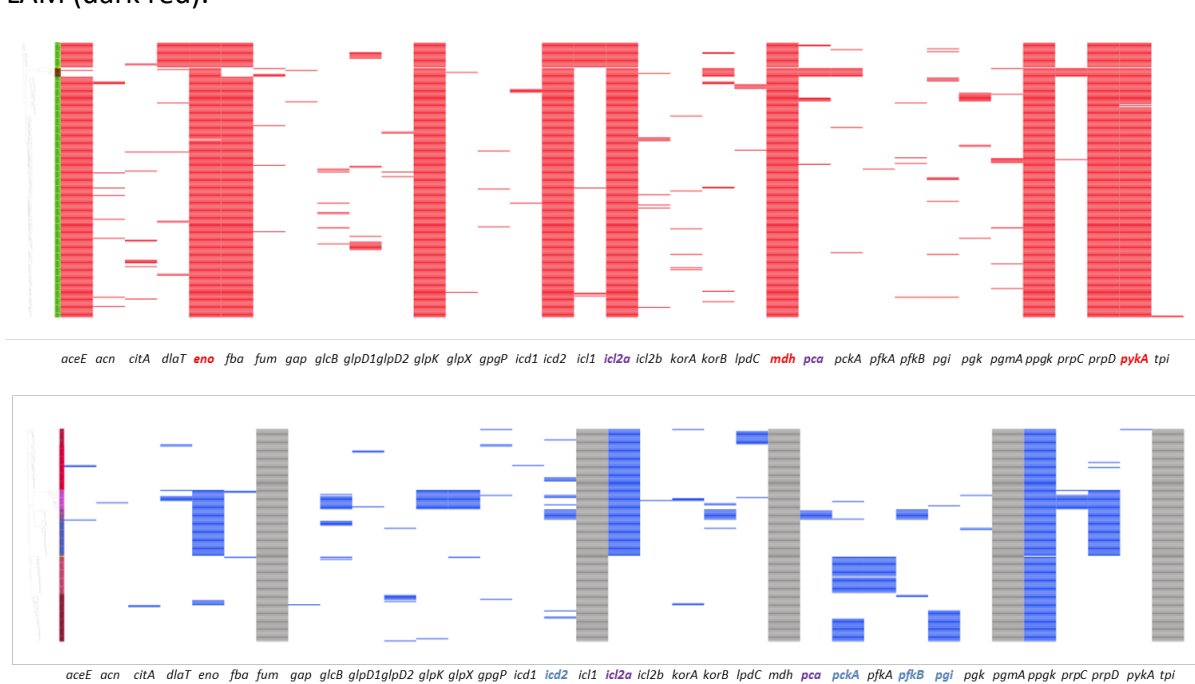

**Figure 3: Mutations in the Central Carbon Metabolic Pathway of MAF and MTB.** Genes with a red colour code have harmful mutations in MAF lineages, indicated next to the gene. Genes with a blue colour code have harmful mutations in MTB lineages, while genes in purple have harmful mutations in the same gene in MAF and MTB lineages.

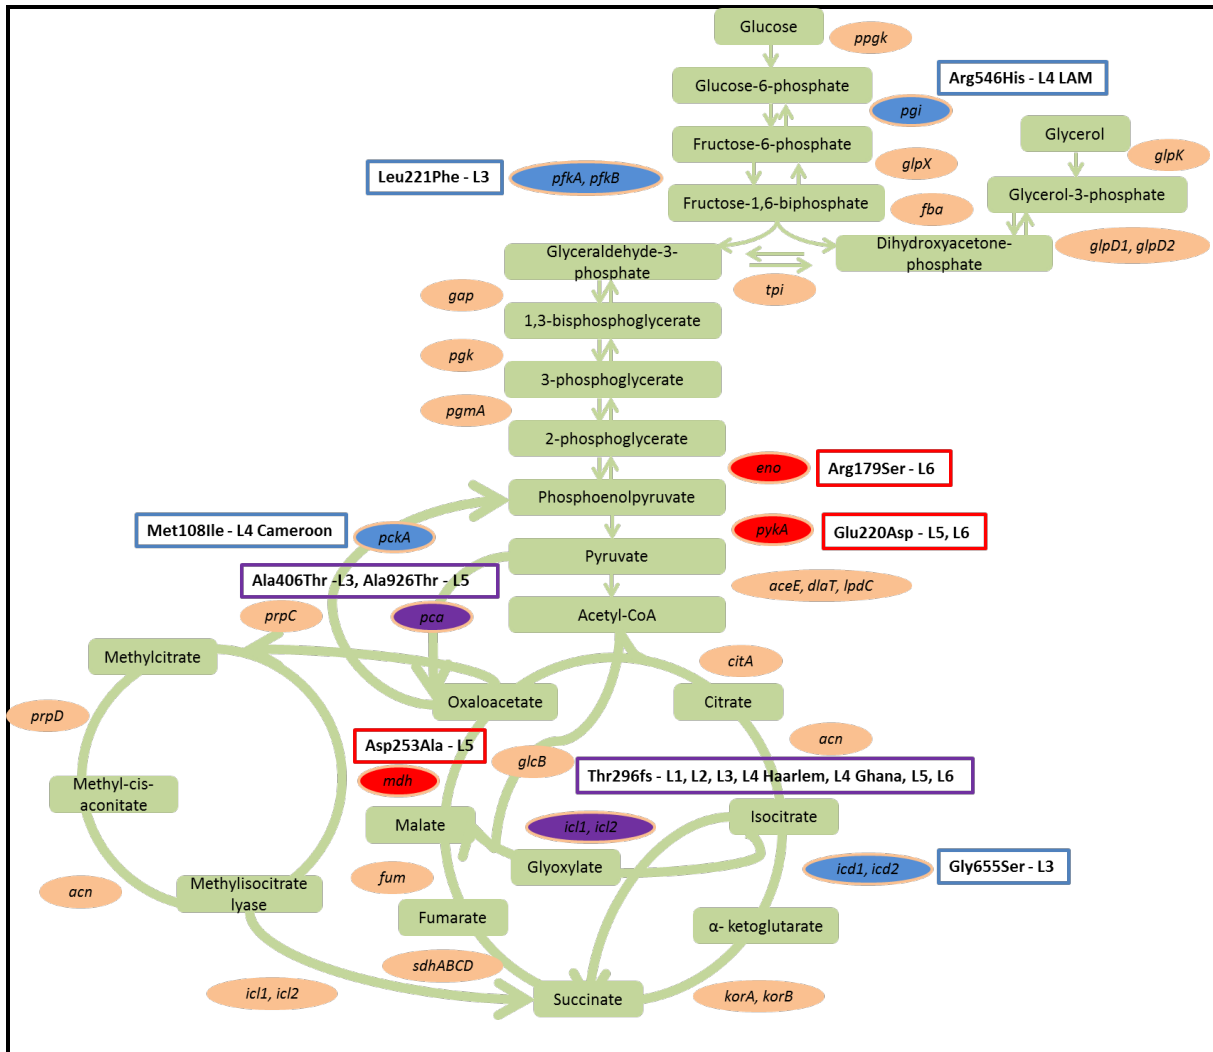

**Figure 4: Mutations detected in the Electron Transport Chain of a) MAF L6 and MAF L5 and b) MTB L4 Ghana, L4 Haarlem, L1, L3, L2, L4 Cameroon and L4 LAM.** Red and blue coloured bars represent nonsynonymous mutations detected in 50-100% of strains per lineage in associated genes shown below each set of bars indicating mutations. Genes emboldened red have mutations detected predicted to be harmful in MAF lineages, genes emboldened blue have mutations detected predicted to be harmful in MTB lineages and genes emboldened purple have mutations detected predicted to be harmful in the same gene in MTB and MAF lineages. Grey bars indicate that no nonsynonymous and/or predicted harmful mutations were detected in the corresponding gene below each set of grey bars. First column colour indicates the lineage: a) MAF L6 (green) and MAF L5 (brown), b) MTB L4 Ghana (brown), L4 Haarlem (red), L1 (lilac), L3 (purple), L2 (blue), L4 Cameroon (pink) and L4

LAM (dark red).

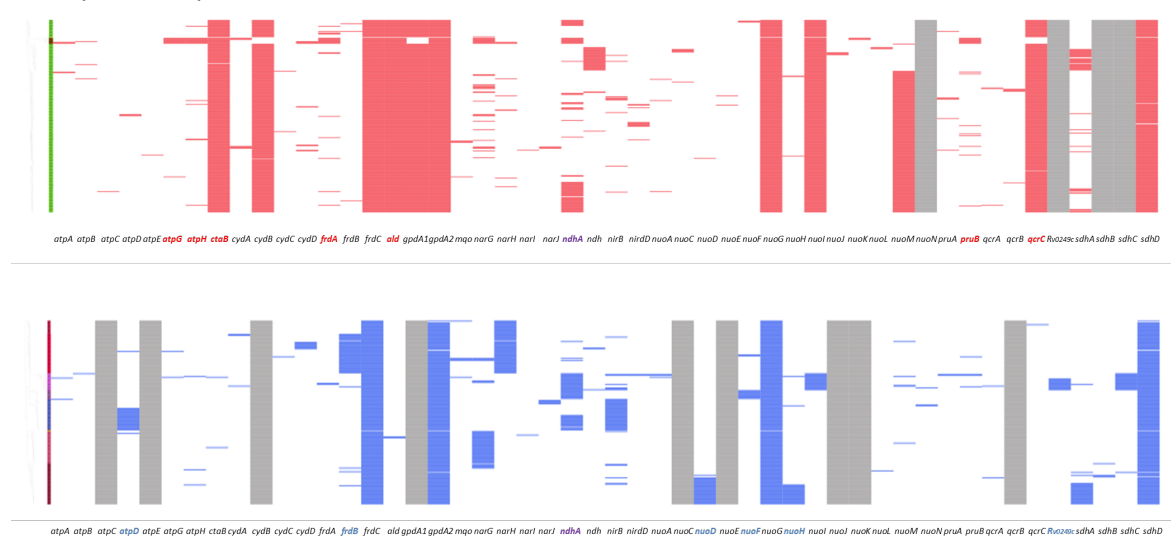

**Figure 5: The core and alternate respiratory chain of mycobacteria during in vitro exponential growth when oxygen is abundant and when oxygen is limited.** Mutations in MAF lineages are indicated in **red** boxes next to each affected complex. Mutations in MTB are indicated in **blue** boxes next to the affected gene while mutations found in the same gene in both MAF and MTB are shown in **purple** boxes. The core chain consists of type I NADH:menaquinone oxidoreductase (NuoA-N), succinate: menaquinone oxidoreductase 1 (SDH1), cytochrome aa3-bc supercomplex (Qcr-Cta) and F1F0-ATPase while the route used during oxygen limitation is composed of Type II NADH:menaquinone oxidoreductase (Ndh); succinate:menaquinone oxidoreductase (SDH2); nitrate reductase (Nar); Fumarate Reductase (Frd) and cytochrome bd oxidase (Cyd), a high affinity terminal oxidase allowing hypoxic survival.

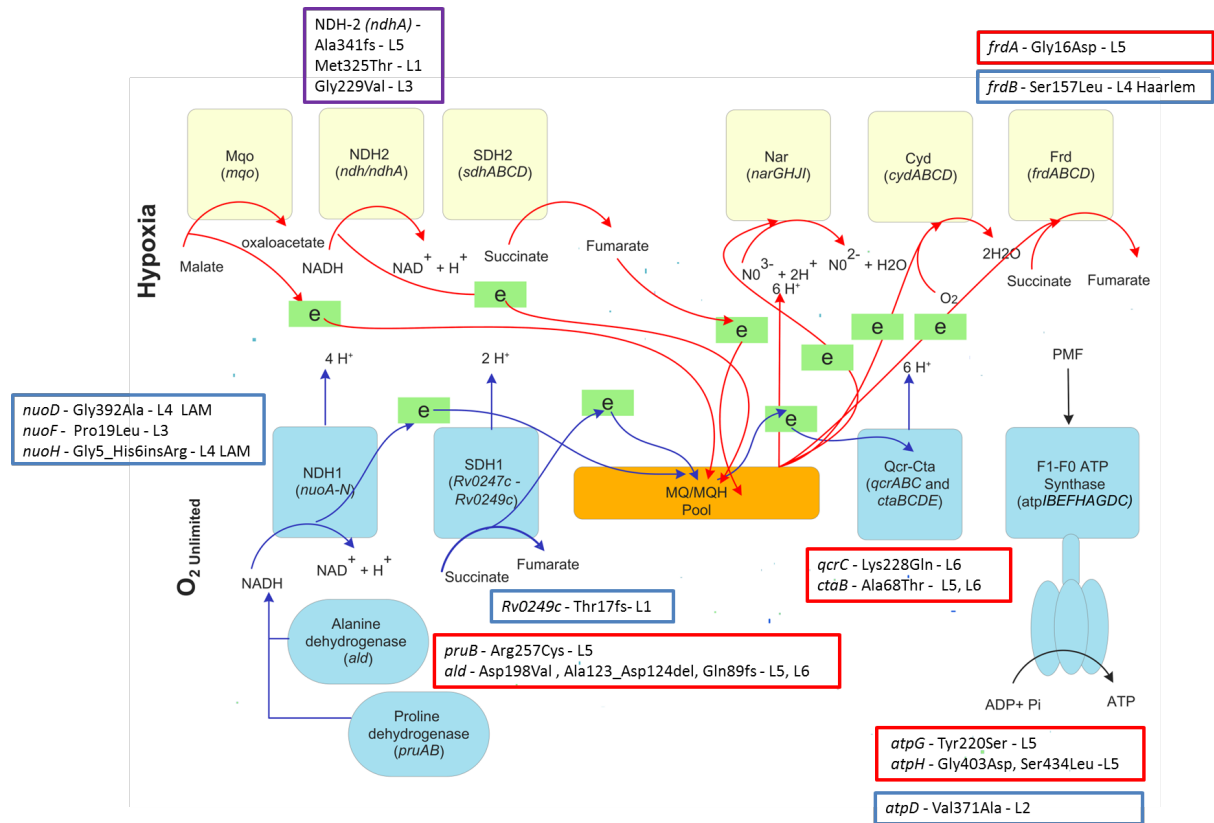

**Table 1: Potentially deleterious mutations in genes encoding enzymes in the Central Carbon Metabolic Pathway.** List of all mutations found to be potentially harmful by PROVEAN (marked by a \*) are listed. The full list of mutations is given in supplementary table S5.

| Gene           | MTB amino acid change  | MTB Lineage                           | MAF amino acid change                           | MAF Lineage |
|----------------|------------------------|---------------------------------------|-------------------------------------------------|-------------|
| <i>pgi</i> *   | Arg546His              | clade of L4<br>LAM                    |                                                 |             |
| <i>pfkB</i> *  | Leu221Phe              | L3                                    |                                                 |             |
| <i>eno</i> *   | Arg8Gly<br>Lys429Gln   | L1, L2, L3                            | Arg8Gly<br>Arg179Ser                            | L5, L6      |
| <i>pykA</i> *  |                        |                                       | Glu220Asp                                       | L5, L6      |
| <i>pca</i> *   | Ala406Thr              | L3                                    | Ala926Thr                                       | L5          |
| <i>icd2</i> *  | Gly655Ser<br>Leu254Val | L3                                    | Val447Met<br>Lys117Asn                          | L6          |
| <i>mdh</i> *   |                        |                                       | Leu326Ile<br>Ala112Thr<br>Asp253Ala             | L5, L6      |
| <i>icl2a</i> * | Gly179Asp<br>Thr296fs  | L1,L2,L3,L4<br>Haarlem, L4<br>Ghana   | Ala146Thr<br>His151Arg<br>Gly179Asp<br>Thr296fs | L5, L6      |
| <i>pckA</i> *  | Met108Ile<br>Ala536Gly | L4<br>Cameroon,<br>clade of L4<br>LAM | Lys422Thr                                       | L5          |

**Table 2: Potentially deleterious mutations in genes and gene subunits encoding Electron Transport Chain enzymes.** List of all mutations found to be potentially harmful by PROVEAN (marked by a \*). The full list of mutations is given in supplementary table S5.



| <b>Gene</b>           | <b>MTB amino acid change</b> | <b>MTB Lineage</b> | <b>MAF amino acid change</b> | <b>MAF Lineage</b> |
|-----------------------|------------------------------|--------------------|------------------------------|--------------------|
| <b><i>ndhA</i>*</b>   | Asn360Ser                    | clade of L2        | Ala341fs                     | L5                 |
|                       | Met325Thr                    | L1                 |                              |                    |
|                       | Gly229Val                    | L3                 |                              |                    |
| <b><i>pruB</i>*</b>   |                              |                    | Arg257Cys                    | L5                 |
| <b><i>qcrC</i>*</b>   |                              |                    | Lys228Gln                    | L6                 |
| <b><i>ctaB</i>*</b>   |                              |                    | Ala68Thr                     | L5, L6             |
| <b><i>cydB</i></b>    |                              |                    | Met98Ile                     | L6                 |
| <b><i>frdA</i>*</b>   |                              |                    | Gly16Asp                     | L5                 |
| <b><i>frdB</i>*</b>   | Ser157Leu                    | L4 Haarlem         |                              |                    |
| <b><i>atpG</i>*</b>   |                              |                    | Tyr220Ser                    | L5                 |
| <b><i>atpH</i>*</b>   |                              |                    | Gly403Asp                    | L5                 |
|                       |                              |                    | Ser434Leu                    |                    |
| <b><i>atpD</i>*</b>   | Val371Ala                    | L2                 |                              |                    |
| <b><i>nuoD</i>*</b>   | Gly392Ala                    | clade of L4        |                              |                    |
|                       |                              | LAM                |                              |                    |
| <b><i>nuoH</i>*</b>   | Gly5_His6insArg              | clade of L4        |                              |                    |
|                       |                              | LAM                |                              |                    |
| <b><i>nuoF</i>*</b>   | Pro19Leu                     | L3                 |                              |                    |
| <b><i>Rv0249c</i></b> | Thr17fs                      | clade of L1        |                              |                    |
| <b>*</b>              |                              |                    |                              |                    |
| <b><i>ald</i>*</b>    |                              |                    | Gln89fs                      | L5, L6             |
|                       |                              |                    | Asp198Val                    |                    |
|                       |                              |                    | Ala123_Asp124del             |                    |

**Table 3: Future proposed experiments.**

| Examination                                                                                                                                                                                                                                                            | Proposed Experiments                                                                                                                                                                                                                                                                                                                     | Predicted Phenotype/<br>Expected outcome                                   |
|------------------------------------------------------------------------------------------------------------------------------------------------------------------------------------------------------------------------------------------------------------------------|------------------------------------------------------------------------------------------------------------------------------------------------------------------------------------------------------------------------------------------------------------------------------------------------------------------------------------------|----------------------------------------------------------------------------|
| Experimentally determine if mutations detected in <i>eno</i> , <i>pca</i> , <i>pgi</i> , <i>pckA</i> , <i>korB</i> , <i>fba</i> , <i>aceE</i> and <i>glpK</i> of the Glycolytic Pathway and TCA cycle contribute to slow growth.                                       | Mutagenesis experiments, complementation studies, Growth studies.<br><br>Mutagenesis studies would involve introducing the mutations detected into L2, L4 or H37Rv and testing for attenuated growth through growth studies or by complementing MAF and MTB L1 and L3 with a wild-type allele and testing for complementation of growth. | It is expected that the reported mutations will lead to attenuated growth. |
| Experimentally determine if mutations detected in <i>ndhA</i> , <i>pruB</i> , <i>qcrC</i> , <i>ctaB</i> , <i>frdAB</i> , <i>sdhA</i> , <i>atpDHG</i> , <i>ald</i> , <i>Rv0249c</i> , <i>narG</i> and <i>cydB</i> of the respiratory pathway contribute to slow growth. | Mutagenesis experiments, complementation studies, Growth studies.<br><br>Mutagenesis studies would involve introducing the mutations detected into L2, L4 or H37Rv and testing for attenuated growth in growth studies or by complementing MAF and MTB L1 and L3 with a wild-type allele and testing for                                 | It is expected that the reported mutations will lead to attenuated growth. |

|                                                                                          |                                                                                                             |                                                                                                                                                                              |
|------------------------------------------------------------------------------------------|-------------------------------------------------------------------------------------------------------------|------------------------------------------------------------------------------------------------------------------------------------------------------------------------------|
|                                                                                          | complementation of growth.                                                                                  |                                                                                                                                                                              |
| Energy generation, in the form of ATP, for cellular processes                            | ATP quantitation assays.                                                                                    | MAF lineages will generate less ATP via the respiratory chain compared to MTB lineages                                                                                       |
| ROS accumulation and DNA damage in MAF cultures relative to MTB                          | Flow cytometry experiments and terminal deoxynucleotidyl transferase dUTP nick end labelling (TUNEL) assay. | Higher levels of ROS in MAF cultures and greater DNA damage of MAF relative to MTB.                                                                                          |
| Host-Pathogen interactions driving geographic restriction of MAF lineages to West Africa | Host genetics and Genome-wide association studies.                                                          | Specific genes in West Africans have undergone strong positive selection and increased the susceptibility of West Africans to MAF infection, permitting host restrictedness. |
